# Supplementary material for: Chitosan (CS)/Hydroxyapatite (HA)/Tricalcium Phosphate (β-TCP)-Based Composites as a Potential Material for Pulp Tissue Regeneration
Source: MDPI journal article supplement (doi:10.3390/polym15153213), 2023-07-28
Supplement: s1 [file s1]

# Supplementary Materials: Chitosan (CS)/Hydroxyapatite (HA)/Tricalcium Phosphate ( $\beta$ -TCP)-Based Composites as a Potential Material for Pulp Tissue Regeneration

Ingrid Zamora <sup>1</sup>, Gilbert Alfonso Morales <sup>1</sup>, Jorge Iván Castro <sup>2</sup>, Lina Marcela Ruiz Rojas <sup>3</sup>, Carlos Humberto Valencia-Llano <sup>1</sup>, Jose Hermínsul Mina Hernandez <sup>3</sup>, Mayra Eliana Valencia Zapata <sup>3</sup> and Carlos David Grande-Tovar <sup>4,\*</sup>

- <sup>1</sup> Grupo Biomateriales Dentales, Escuela de Odontología, Universidad del Valle, Calle 4B # 36-00, Cali 76001, Colombia; ingrid.zamora@correounivalle.edu.co (I.Z.); gilbert.morales@correounivalle.edu.co (G.A.M.); carlos.humberto.valencia@correounivalle.edu.co (C.H.V.-L.)
- <sup>2</sup> Laboratorio SIMERQO, Departamento de Química, Universidad del Valle, Calle 13 No. 100-00, Cali 76001, Colombia; jorge.castro@correounivalle.edu.co
- <sup>3</sup> Grupo de Materiales Compuestos, Escuela de Ingeniería de Materiales, Facultad de Ingeniería, Universidad del Valle, Calle 13 No. 100-00, Cali 760032, Colombia; ruiz.lina@correounivalle.edu.co (L.M.R.R.); jose.mina@correounivalle.edu.co (J.H.M.H.); valencia.mayra@correounivalle.edu.co (M.E.V.Z.)
- <sup>4</sup> Grupo de Investigación de Fotoquímica y Fotobiología, Universidad del Atlántico, Carrera 30 Número 8-49, Puerto Colombia 081008, Colombia
- \* Correspondence: carlosgrande@mail.uniatlantico.edu.co; Tel.: +57-5-3599484

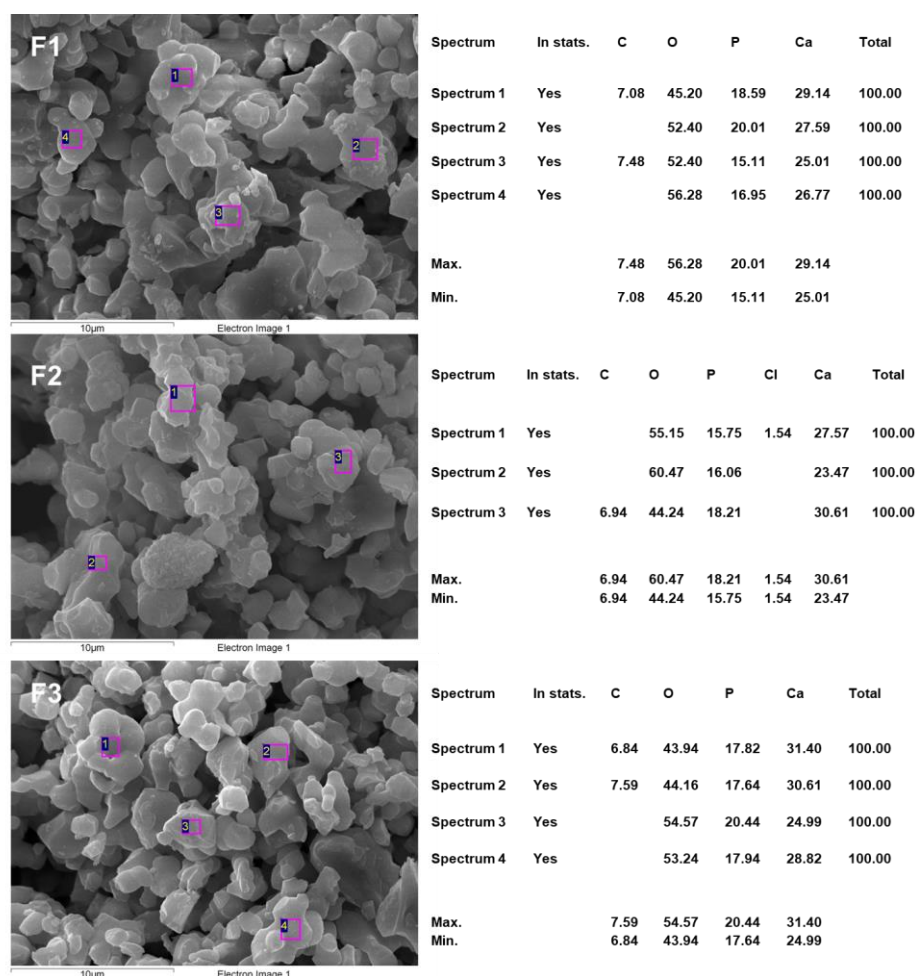

**Figure S1.** EDS for the composite CS/HA/ $\beta$ -TCP. F1, 87.7% $\beta$ -TCP/3.5%CS/8.8%Commercial HA/0.8mL CaCl<sub>2</sub>; F2, 87.7% $\beta$ -TCP/3.5%CS/8.8%Commercial HA/1mL CaCl<sub>2</sub>; F3, 87.7% $\beta$ -TCP/3.5%CS/8.8%natural HA /0.8mL CaCl<sub>2</sub>.
